# Supplementary material for: Capturing the impact of protein unfolding on the dynamic assembly of protein networks
Source: Royal Society of Chemistry journal article supplement (doi:10.1039/d4sm01413h), 2025-01-01
Supplement: d4sm01413h1.pdf [file d4sm01413h1.pdf]

## Supporting Information

### Capturing the Impact of Protein Unfolding on the Dynamic Assembly of Protein Networks

Matt D G Hughes<sup>1</sup>, Sophie Cussons<sup>2,3</sup>, Ahmad Borumand<sup>1</sup>, Arwen I I Tyler<sup>4</sup>, David J Brockwell<sup>2,3</sup>, and Lorna Dougan<sup>\*1,2</sup>

<sup>1</sup> School of Physics and Astronomy, Faculty of Engineering and Physical Sciences, University of Leeds, UK

<sup>2</sup> Astbury Centre for Structural Molecular Biology, University of Leeds, UK

<sup>3</sup> School of Molecular and Cellular Biology, Faculty of Biological Sciences, University of Leeds, UK

<sup>4</sup> School of Food Science and Nutrition, Faculty of Environment, University of Leeds, UK

Corresponding Author: Lorna Dougan, L.Dougan@leeds.ac.uk

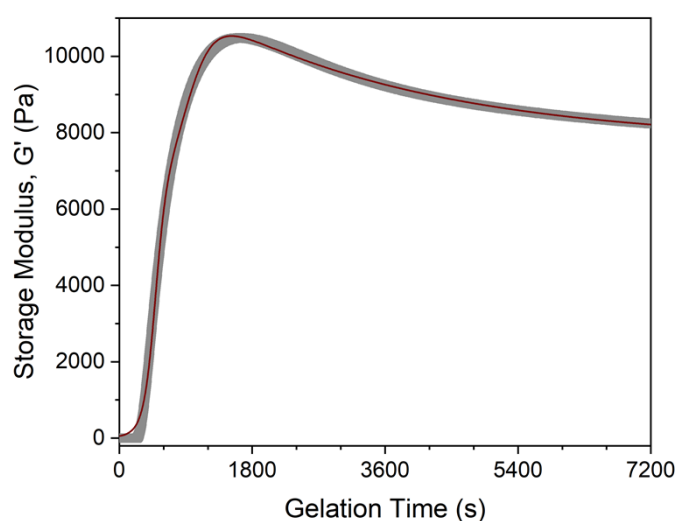

**Figure S1: Dual sigmoid formation with post formation relaxation effectively fits rheology gelation curves of force labile BSA hydrogels.** Example fitted gelation curve of force-labile BSA hydrogels (final concentrations: 100 mg/mL BSA, 50 mM NaPS, 100  $\mu$ M Ru(BiPy)<sub>3</sub>, 3mM DTT). Where the grey squares are the rheology data of a single BSA hydrogel repeat and the dark red line shows equation 1 fitted to the data.

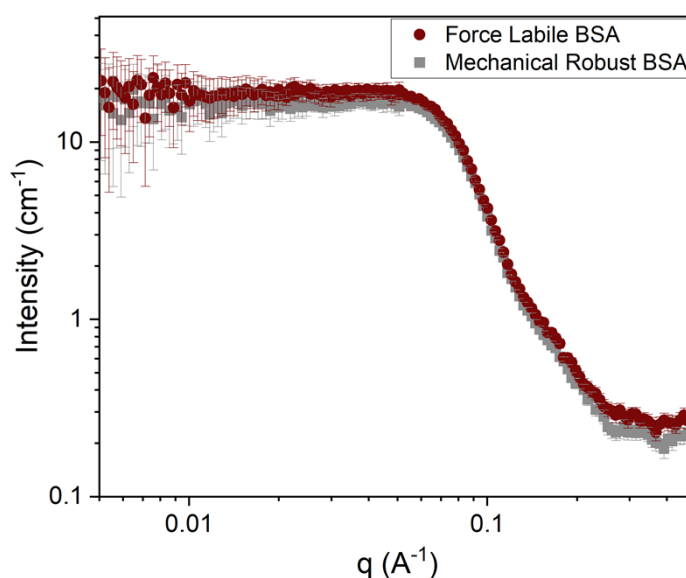

**Figure S2: The addition of dithiothreitol (DTT) to BSA at 100mg/ml does not lead to a significant change in monomer shape detectable via SAXS.** SAXS curves of BSA pre-gel solutions (final concentrations: 100 mg/mL BSA, 50 mM NaPS, 100  $\mu$ M Ru(BiPy)<sub>3</sub>), in the presence (force labile) and absence (mechanically robust) of 3mM DTT.

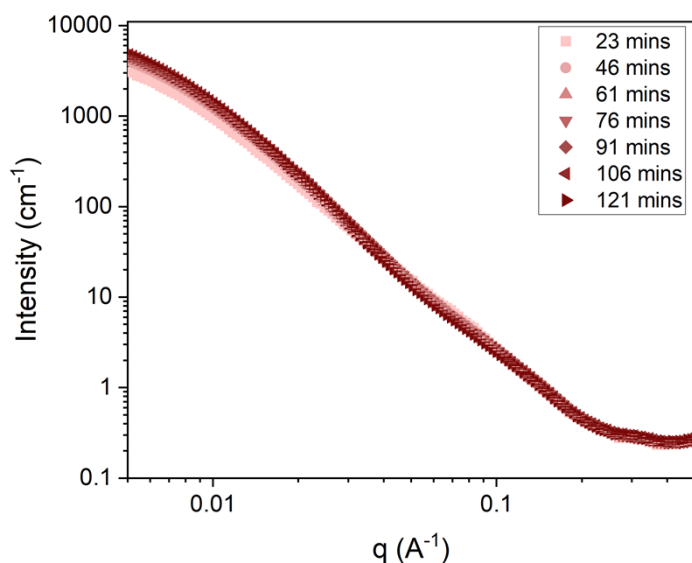

**Figure S3: Time-resolved SAXS tracks the full gelation of force-labile over 2 hours.** Additional SAXS curves of force-labile BSA (final concentrations: 100 mg/mL BSA, 50 mM NaPS, 100  $\mu$ M Ru(BiPy)<sub>3</sub>, 3mM DTT) as a function of gelation time, for gelation times from 23 mins up to 121 mins, in 15 mins intervals

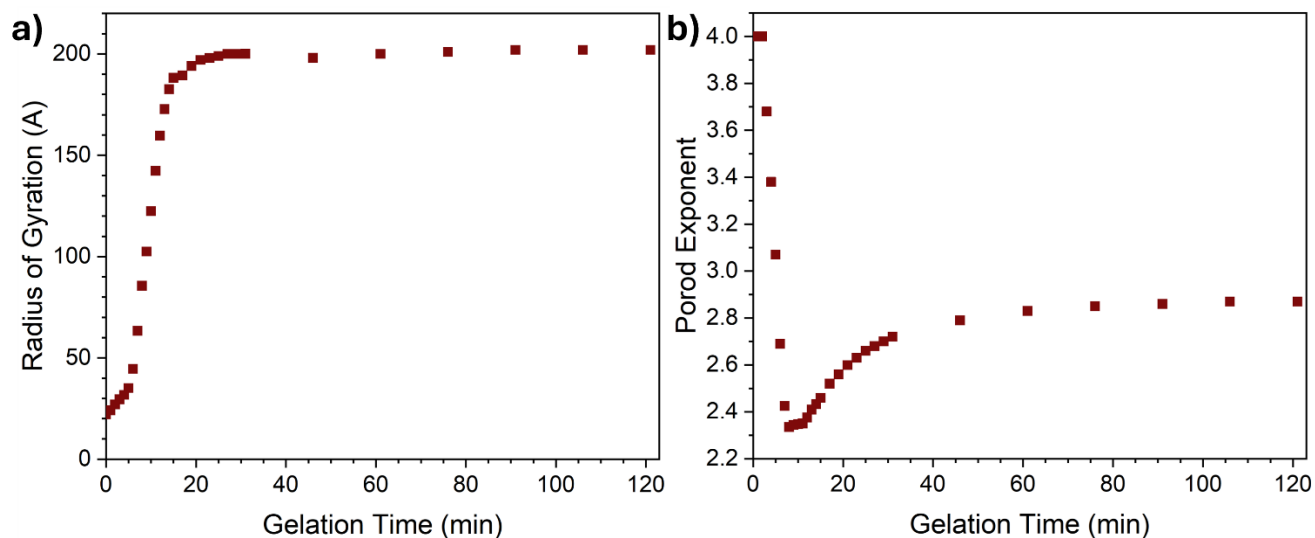

**Figure S4: Model independent SAXS analysis, of force labile BSA hydrogels, shows similar temporal trends observed in the extracted parameters from fractal model analysis.** The model-independent fit parameters, radius of gyration,  $R_g$  (a) and Porod exponent (b), extracted from the SAXS curves in figure 4a as a function of gelation time for force labile BSA protein hydrogel.

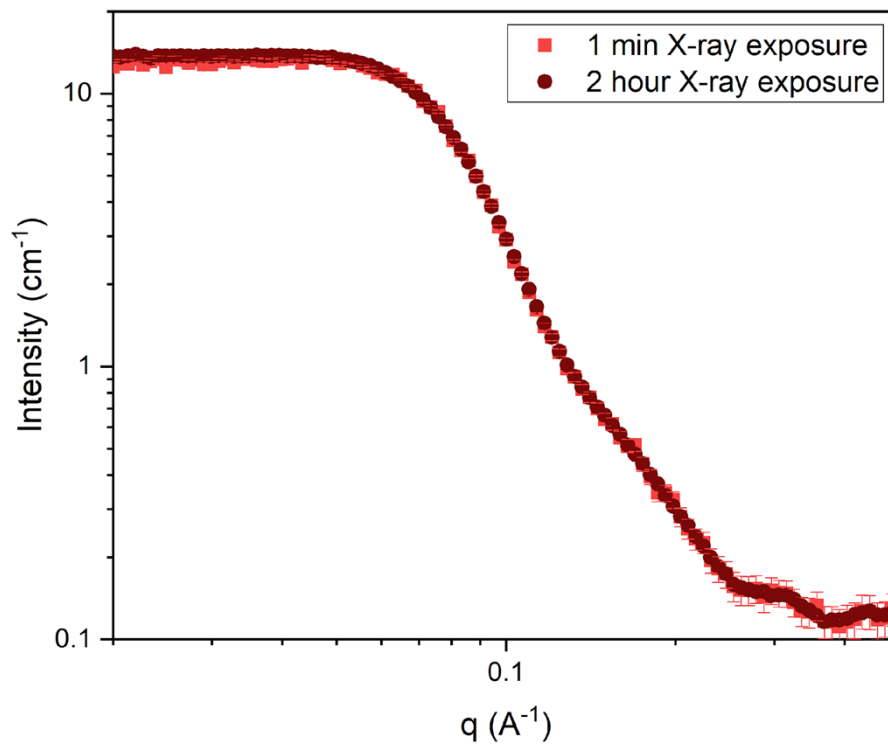

**Figure S5: The exposure to x-rays during the experiment are not sufficient to cause radiation damage or significant crosslinking which leads to structural changes.** SAXS curves of BSA pre-gel solutions (final concentrations: 100 mg/mL BSA, 50 mM NaPS, 100  $\mu\text{M}$  Ru(BiPy)<sub>3</sub>) exposed to 1min of X-rays (light red) and 2 hours X-rays (dark red).
